# Supplementary material for: Genome-wide identification and characterization of the KNOX gene family in Vitis amurensis
Source: PeerJ. 2025 Apr 9;13:e19250. doi: 10.7717/peerj.19250 (PMC11992975; doi:10.7717/peerj.19250)
Supplement: Supplemental Information 1 [file peerj-13-19250-s001.xlsx]

## Sheet: Relative expression
Sample Name	Gene Name	Ct	Ct	Ct	Actin Ct	Actin Ct	Actin Ct	Ct Mean	Actin Ct Mean	△Ct	△Ct Mean	△△Ct	2-△△Ct
normal	VaKNOX1	26.4234	26.5554	26.9473	26.3232	26.3352	26.8271	26.6421	26.4952	0.146878	0.121357	0.0255206	0.982466
normal	VaKNOX1	26.6859	26.9189	26.8542	26.6858	26.8291	26.694	26.8197	26.7363	0.083382	0.121357	-0.0379754	1.02667
normal	VaKNOX1	26.5465	27.0212	26.7471	26.5454	26.821	26.5469	26.7716	26.6378	0.133812	0.121357	0.0124548	0.991404
cold	VaKNOX1	27.649	27.3921	27.836	26.6471	26.1519	26.5958	27.6257	26.4649	1.16078	0.121357	1.03942	0.486522
cold	VaKNOX1	27.8295	27.45	27.8194	26.8267	26.1698	26.6137	27.6996	26.5367	1.1629	0.121357	1.04154	0.485807
cold	VaKNOX1	27.963	27.2667	27.7106	26.9593	26.1347	26.5786	27.6468	26.5575	1.08925	0.121357	0.967896	0.511251
normal	VaKNOX2	27.4225	27.9506	27.6355	27.4179	27.8086	27.4935	27.6696	27.5733	0.0962207	0.103188	-0.00696714	1.00484
normal	VaKNOX2	28.019	27.6575	27.7814	28.0135	27.5055	27.6294	27.8193	27.7162	0.103188	0.103188	-1.05888e-14	1
normal	VaKNOX2	28.0576	27.7074	27.8313	28.0511	27.5454	27.6693	27.8654	27.7553	0.110155	0.103188	0.00696714	0.995182
cold	VaKNOX2	28.5451	27.9833	27.7092	26.5377	26.8113	26.5372	28.0792	26.6288	1.45046	0.103188	1.34727	0.393036
cold	VaKNOX2	27.7266	27.0642	27.9291	26.7184	26.8822	26.7471	27.5733	26.7826	0.790756	0.103188	0.687568	0.6209
cold	VaKNOX2	28.2841	27.5481	27.9916	26.275	26.3561	26.804	27.9413	26.4784	1.46291	0.103188	1.35972	0.389658
normal	VaKNOX3	26.2576	26.259	26.318	26.2476	26.057	26.1159	26.2782	26.1402	0.138024	0.111658	0.026366	0.98189
normal	VaKNOX3	26.5711	26.302	26.5429	26.5602	26.3899	26.3308	26.472	26.427	0.0449914	0.111658	-0.0666662	1.04729
normal	VaKNOX3	26.9677	26.9919	27.0508	26.9558	26.7698	26.8287	27.0034	26.8515	0.151958	0.111658	0.0403002	0.972453
cold	VaKNOX3	26.6922	26.7278	26.7867	26.6794	26.4957	26.5546	26.7355	26.5766	0.158925	0.111658	0.0472674	0.967768
cold	VaKNOX3	27.6407	27.0877	27.1466	27.027	26.8456	26.9045	27.2916	26.9257	0.365892	0.111658	0.254235	0.838432
cold	VaKNOX3	26.9042	26.9626	27.0215	26.8897	26.7105	26.7694	26.9627	26.7899	0.172859	0.111658	0.0612017	0.958465
normal	VaKNOX4	26.2967	26.3425	26.3844	26.2813	26.0804	26.1223	26.3412	26.1614	0.179826	0.140127	0.0396995	0.972858
normal	VaKNOX4	26.5142	26.6374	26.5953	26.4979	26.3653	26.3232	26.5823	26.3955	0.186794	0.140127	0.0466667	0.968171
normal	VaKNOX4	27.0067	26.8653	26.9072	26.9895	26.7932	26.8351	26.9264	26.8726	0.0537607	0.140127	-0.0863662	1.06169
cold	VaKNOX4	28.2313	28.5912	28.6331	26.7131	26.5191	26.561	28.4852	26.5978	1.88739	0.140127	1.74727	0.297865
cold	VaKNOX4	29.0798	28.9641	28.983	27.0607	26.869	26.9109	29.009	26.9469	2.06204	0.140127	1.92192	0.263904
cold	VaKNOX4	28.6433	28.806	28.8479	26.9234	26.7339	26.7758	28.7657	26.811	1.95466	0.140127	1.81454	0.284296
normal	VaKNOX5	27.3588	27.9159	27.6008	27.338	27.8438	27.5287	27.6251	27.5702	0.0549628	-0.0607148	0.115678	0.922949
normal	VaKNOX5	27.3293	27.8438	27.5259	27.3776	27.8017	27.4866	27.5663	27.5553	0.0109956	-0.0607148	0.0717105	0.951509
normal	VaKNOX5	27.9808	27.1757	27.1686	27.9582	27.4936	27.6175	27.4417	27.6898	-0.248103	-0.0607148	-0.187388	1.1387
cold	VaKNOX5	28.6714	28.4156	28.2855	26.2478	26.3435	26.8135	28.4575	26.4683	1.9892	-0.0607148	2.04991	0.241499
cold	VaKNOX5	28.8979	28.9305	28.5964	26.4734	26.8585	26.5544	28.8082	26.6287	2.1795	-0.0607148	2.24021	0.211655
cold	VaKNOX5	28.1704	28.5084	28.9503	26.945	26.5364	26.8783	28.543	26.7866	1.75647	-0.0607148	1.81718	0.283775
normal	VaKNOX6	26.0559	26.2901	26.0856	27.0297	26.9181	26.0136	26.1439	26.6538	-0.509901	-0.0160187	-0.493882	1.40823
normal	VaKNOX6	26.413	26.0502	26.9059	26.1033	25.9781	25.8339	26.4564	25.9718	0.484604	-0.0160187	0.500623	0.706802
normal	VaKNOX6	26.5359	26.0327	26.4076	26.5079	26.2011	26.3356	26.3254	26.3482	-0.0227595	-0.0160187	-0.00674081	1.00468
cold	VaKNOX6	24.6165	24.658	24.4924	26.3875	26.586	26.4203	24.589	26.4646	-1.87565	-0.0160187	-1.85964	3.62916
cold	VaKNOX6	24.328	24.7504	24.3625	26.3981	26.2784	26.2905	24.4803	26.3223	-1.84203	-0.0160187	-1.82601	3.54556
cold	VaKNOX6	24.3657	24.3093	24.9093	26.3349	26.6372	26.8373	24.5281	26.6032	-2.07506	-0.0160187	-2.05905	4.16711
normal	VaKNOX7	25.7661	25.2381	26.047	25.729	25.166	25.975	25.6837	25.6233	0.06039	0.160668	-0.100278	1.07198
normal	VaKNOX7	25.8436	26.4179	25.8899	25.3057	25.946	25.8179	26.0505	25.6898	0.360641	0.160668	0.199973	0.870567
normal	VaKNOX7	25.3591	26.0009	25.8728	25.3203	25.9289	25.8008	25.7443	25.6833	0.0609728	0.160668	-0.0996949	1.07155
cold	VaKNOX7	24.2987	24.0598	24.9317	25.2589	25.9188	25.8597	24.4301	25.6791	-1.24906	0.160668	-1.40973	2.65687
cold	VaKNOX7	24.3362	24.0207	24.8926	25.2955	25.9487	25.8206	24.4165	25.6883	-1.27176	0.160668	-1.43243	2.699
cold	VaKNOX7	24.7727	24.8736	24.3225	26.0311	25.8016	25.2505	24.6563	25.6944	-1.03813	0.160668	-1.19879	2.29548
normal	VaKNOX8	25.1968	25.2981	25.2697	25.1651	25.2261	25.1977	25.2549	25.1963	0.0585689	0.103314	-0.0447449	1.0315
normal	VaKNOX8	26.2853	26.1752	26.2692	26.2527	26.1032	26.1971	26.2432	26.1844	0.0588693	0.103314	-0.0444445	1.03129
normal	VaKNOX8	25.8087	25.2075	25.3069	25.3752	25.1355	25.2349	25.441	25.2485	0.192503	0.103314	0.0891894	0.940051
cold	VaKNOX8	26.6436	26.6244	26.8743	26.2092	26.3524	26.8023	26.7141	26.4546	0.25947	0.103314	0.156157	0.897413
cold	VaKNOX8	26.3571	26.4093	26.8892	26.2218	26.3373	26.8172	26.5519	26.4587	0.0931042	0.103314	-0.0102096	1.0071
cold	VaKNOX8	26.2846	26.9552	26.8201	26.6484	26.8832	26.7481	26.6866	26.7599	-0.0732626	0.103314	-0.176576	1.1302
normal	VaKNOX9	27.3102	27.9265	27.6114	27.2677	27.8545	27.5394	27.616	27.5539	0.0621749	0.089142	-0.0269672	1.01887
normal	VaKNOX9	27.9747	27.4914	27.7153	27.9313	27.5194	27.6433	27.7271	27.698	0.029142	0.089142	-0.06	1.04247
normal	VaKNOX9	27.7562	27.8173	27.5622	27.312	27.8053	27.4902	27.7119	27.5358	0.176109	0.089142	0.0869672	0.9415
cold	VaKNOX9	27.2798	27.6492	27.8471	26.1346	26.3772	26.7751	27.592	26.4289	1.16308	0.089142	1.07393	0.475022
cold	VaKNOX9	27.5063	27.2541	27.58	26.4602	26.7821	26.508	27.4468	26.5834	0.863377	0.089142	0.774235	0.584699
cold	VaKNOX9	27.3378	27.925	27.7899	26.5908	26.853	26.7179	27.6842	26.7206	0.963677	0.089142	0.874535	0.54543
normal	VaKNOX10	27.7474	27.3995	27.0076	27.6995	27.3275	26.9356	27.3848	27.3209	0.0639779	-0.0134688	0.0774467	0.947733
normal	VaKNOX10	26.6332	27.307	27.1328	26.7844	27.2347	27.5607	27.0243	27.1933	-0.168963	-0.0134688	-0.155494	1.1138
normal	VaKNOX10	27.2236	27.2804	27.1855	27.1739	27.2083	27.1135	27.2298	27.1652	0.0645789	-0.0134688	0.0780477	0.947339
cold	VaKNOX10	27.4457	27.2237	27.8833	27.7951	27.5517	27.8113	27.5176	27.7194	-0.201787	-0.0134688	-0.188318	1.13943
cold	VaKNOX10	28.0498	28.1315	28.0303	27.9983	28.0595	27.9583	28.0705	28.0054	0.0651799	-0.0134688	0.0786487	0.946944
cold	VaKNOX10	28.8136	28.8949	28.9348	28.7612	28.6229	28.8628	28.8811	28.749	0.132147	-0.0134688	0.145616	0.903993
buds	VaKNOX1	27.1225	27.3748	27.2457	27.9692	28.0027	27.9737	27.2477	27.9819	-0.734219	0.121357	-0.855577	1.80948
buds	VaKNOX1	27.5394	27.2458	27.4114	28.4852	28.2738	28.2394	27.3989	28.3328	-0.933919	0.121357	-1.05528	2.07812
buds	VaKNOX1	26.6136	26.6299	27.0945	27.5804	27.4579	27.5225	26.7793	27.5203	-0.740942	0.121357	-0.862299	1.81793
old leaves	VaKNOX1	26.5915	26.4609	26.1737	26.5355	26.5889	26.5017	26.4087	26.542	-0.133318	0.121357	-0.254675	1.19307
old leaves	VaKNOX1	26.2448	26.5088	26.5987	26.6879	26.4367	26.5267	26.4507	26.5504	-0.0996837	0.121357	-0.221041	1.16557
old leaves	VaKNOX1	27.6081	27.6135	28.3563	27.923	27.5415	28.2843	27.8593	27.9163	-0.0569627	0.121357	-0.17832	1.13157
tendrils	VaKNOX1	26.4678	26.5426	26.6945	28.4091	28.4706	27.6225	26.5683	28.1674	-1.59908	0.121357	-1.72044	3.29537
tendrils	VaKNOX1	26.2658	26.1374	26.2886	28.2062	28.0654	27.8144	26.2306	28.0287	-1.79803	0.121357	-1.91939	3.78263
tendrils	VaKNOX1	26.1475	26.3905	26.2144	27.887	27.8185	27.9424	26.2508	27.8826	-1.63182	0.121357	-1.75317	3.37099
seeds	VaKNOX1	27.9582	27.969	26.7682	27.4967	27.4969	27.5962	27.5651	27.5299	0.0351521	0.121357	-0.0862053	1.06157
seeds	VaKNOX1	28.7415	28.8479	28.89	28.2792	28.4759	27.818	28.8265	28.191	0.635453	0.121357	0.514095	0.700232
seeds	VaKNOX1	28.1142	28.3129	28.6314	27.851	27.9409	27.5593	28.3528	27.7837	0.569086	0.121357	0.447729	0.733196
roots	VaKNOX1	26.2586	27.4571	26.835	26.0945	26.3851	26.763	26.8503	26.4142	0.436054	0.121357	0.314696	0.80402
roots	VaKNOX1	26.8911	27.582	26.9319	26.8261	26.51	26.8599	27.135	26.732	0.403021	0.121357	0.281663	0.822642
roots	VaKNOX1	26.5996	27.2159	27.3808	26.5337	26.8439	26.7088	27.0655	26.6955	0.369988	0.121357	0.248631	0.841695
fruits	VaKNOX1	26.6713	25.2388	26.0397	25.6463	25.1668	25.9677	25.9833	25.5936	0.389678	0.121357	0.26832	0.830286
fruits	VaKNOX1	26.3577	25.6117	25.9356	25.8899	25.5397	25.6636	25.9684	25.6978	0.270589	0.121357	0.149232	0.901731
fruits	VaKNOX1	25.9922	25.9346	25.3835	25.3236	25.8626	25.3115	25.7701	25.4992	0.27089	0.121357	0.149532	0.901543
flowers	VaKNOX1	25.2698	25.2495	25.3284	25.6282	25.1775	25.9564	25.2826	25.5874	-0.304786	0.121357	-0.426143	1.34364
flowers	VaKNOX1	25.1762	25.2921	25.3703	26.0058	25.8494	25.2983	25.2796	25.7178	-0.438277	0.121357	-0.559635	1.4739
flowers	VaKNOX1	25.3617	25.2823	25.2953	25.5904	25.2103	25.9232	25.3131	25.5747	-0.261542	0.121357	-0.3829	1.30396
stems	VaKNOX1	26.4234	26.5554	26.9473	26.3232	26.3352	26.8271	26.6421	26.4952	0.146878	0.121357	0.0255206	0.982466
stems	VaKNOX1	26.6859	26.9189	26.8542	26.6858	26.8291	26.694	26.8197	26.7363	0.083382	0.121357	-0.0379754	1.02667
stems	VaKNOX1	26.5465	27.0212	26.7471	26.5454	26.821	26.5469	26.7716	26.6378	0.133812	0.121357	0.0124548	0.991404
buds	VaKNOX2	25.4608	25.774	25.6889	27.1859	27.2019	27.2168	25.6412	27.2015	-1.56034	0.103188	-1.66353	3.1679
buds	VaKNOX2	26.2373	26.1859	26.4708	27.8615	27.8138	27.7987	26.298	27.8247	-1.52671	0.103188	-1.62989	3.0949
buds	VaKNOX2	25.8208	25.9708	25.7556	27.5441	27.4987	27.4836	25.8491	27.5088	-1.65977	0.103188	-1.76296	3.39393
old leaves	VaKNOX2	26.7433	26.6947	26.6796	27.6657	27.6226	27.6075	26.7059	27.632	-0.926105	0.103188	-1.02929	2.04102
old leaves	VaKNOX2	26.9063	26.8746	26.6985	27.8278	27.5025	27.6264	26.8265	27.6523	-0.825805	0.103188	-0.928993	1.90395
old leaves	VaKNOX2	26.7303	26.9975	26.7214	27.8509	27.5254	27.6493	26.8164	27.6752	-0.858838	0.103188	-0.962026	1.94804
tendrils	VaKNOX2	25.4883	25.3194	25.1453	26.408	26.7473	26.4732	25.3177	26.5429	-1.2252	0.103188	-1.32839	2.51123
tendrils	VaKNOX2	25.5753	25.2053	25.7702	26.4941	26.8332	26.6981	25.5169	26.6752	-1.15824	0.103188	-1.26142	2.39732
tendrils	VaKNOX2	25.4874	25.1222	25.2481	26.4052	26.7501	26.476	25.2859	26.5438	-1.25794	0.103188	-1.36112	2.56885
seeds	VaKNOX2	26.2284	26.3691	26.319	26.0453	26.397	26.7469	26.3055	26.3964	-0.0909691	0.103188	-0.194157	1.14406
seeds	VaKNOX2	26.4734	26.425	26.3629	26.5894	26.3529	26.7908	26.4204	26.5777	-0.157335	0.103188	-0.260523	1.19791
seeds	VaKNOX2	26.3204	26.6019	26.6518	26.8155	26.5298	26.8797	26.5247	26.7417	-0.217035	0.103188	-0.320223	1.24852
roots	VaKNOX2	26.8014	26.9258	26.7907	26.5156	26.8537	26.7187	26.8393	26.696	0.143266	0.103188	0.0400779	0.972602
roots	VaKNOX2	26.5014	26.1637	26.1296	26.0147	26.0917	26.0576	26.2649	26.0546	0.210233	0.103188	0.107045	0.928488
roots	VaKNOX2	26.6124	26.4106	26.4345	26.5248	26.3386	26.3725	26.4858	26.4119	0.0738668	0.103188	-0.0293211	1.02053
fruits	VaKNOX2	24.7194	25.1765	24.8424	26.6309	26.8045	26.7704	24.9127	26.7352	-1.8225	0.103188	-1.92569	3.79918
fruits	VaKNOX2	24.8184	24.9024	24.9683	26.629	26.5304	26.7963	24.8963	26.6519	-1.75553	0.103188	-1.85872	3.62686
fruits	VaKNOX2	25.1194	24.9523	24.9182	26.4291	26.8803	26.8462	24.9966	26.7185	-1.7219	0.103188	-1.82509	3.54328
flowers	VaKNOX2	26.3054	26.2172	26.2831	26.4142	26.7452	26.7111	26.2685	26.6235	-0.354931	0.103188	-0.458119	1.37375
flowers	VaKNOX2	26.2494	26.1841	26.122	26.3573	26.4121	26.55	26.1851	26.4398	-0.254631	0.103188	-0.357819	1.28149
flowers	VaKNOX2	26.2304	26.389	26.4509	26.7374	26.617	26.5789	26.3567	26.6444	-0.287664	0.103188	-0.390851	1.31117
stems	VaKNOX2	27.4225	27.9506	27.6355	27.4179	27.8086	27.4935	27.6696	27.5733	0.0962207	0.103188	-0.00696714	1.00484
stems	VaKNOX2	28.019	27.6575	27.7814	28.0135	27.5055	27.6294	27.8193	27.7162	0.103188	0.103188	9.10383e-15	1
stems	VaKNOX2	28.0576	27.7074	27.8313	28.0511	27.5454	27.6693	27.8654	27.7553	0.110155	0.103188	0.00696714	0.995182
buds	VaKNOX3	25.2694	25.3376	25.1755	26.7728	26.7656	26.7035	25.2608	26.7473	-1.48646	0.111658	-1.59812	3.02748
buds	VaKNOX3	25.2374	25.3415	25.1534	26.8399	26.4695	26.8614	25.2441	26.7236	-1.47949	0.111658	-1.59115	3.0129
buds	VaKNOX3	25.2034	25.2714	25.1983	26.705	26.8194	26.7263	25.2244	26.7502	-1.52586	0.111658	-1.63752	3.1113
old leaves	VaKNOX3	26.1744	26.4393	26.8452	26.6751	26.5673	26.7732	26.4863	26.6718	-0.18556	0.111658	-0.297218	1.22877
old leaves	VaKNOX3	26.2584	26.4562	26.8281	26.6582	26.5842	26.7561	26.5142	26.6662	-0.151926	0.111658	-0.263584	1.20046
old leaves	VaKNOX3	26.5874	26.7081	26.6773	26.6863	26.8361	26.701	26.6576	26.7411	-0.0835255	0.111658	-0.195183	1.14487
tendrils	VaKNOX3	25.8766	25.8251	25.8214	27.2747	27.3031	27.3494	25.8411	27.3091	-1.46799	0.111658	-1.57965	2.98897
tendrils	VaKNOX3	25.9352	25.8657	25.8398	27.4323	27.4336	27.3578	25.8802	27.4079	-1.52769	0.111658	-1.63935	3.11525
tendrils	VaKNOX3	25.9548	25.9765	26.0985	27.5511	27.4145	27.4264	26.0099	27.464	-1.45406	0.111658	-1.56572	2.96024
seeds	VaKNOX3	27.3484	27.4047	27.3286	27.3437	27.6127	27.2566	27.3606	27.4043	-0.043757	0.111658	-0.155415	1.11374
seeds	VaKNOX3	27.3885	27.3914	27.418	27.4829	27.3894	27.416	27.3993	27.4294	-0.0301231	0.111658	-0.141781	1.10327
seeds	VaKNOX3	27.5185	27.4338	27.5424	27.5789	27.5618	27.5704	27.4983	27.5704	-0.0721117	0.111658	-0.183769	1.13585
roots	VaKNOX3	27.4082	27.4032	27.3953	27.3008	27.3312	27.3233	27.4022	27.3184	0.0838112	0.111658	-0.0278464	1.01949
roots	VaKNOX3	27.4379	27.4367	27.3997	27.4296	27.3945	27.5247	27.4247	27.4496	-0.0248509	0.111658	-0.136508	1.09924
roots	VaKNOX3	27.1685	27.0665	27.2701	27.1593	27.1945	27.1981	27.1684	27.184	-0.0155878	0.111658	-0.127245	1.09221
fruits	VaKNOX3	25.2713	25.166	25.1346	26.9612	26.894	26.4626	25.1907	26.7726	-1.58195	0.111658	-1.69361	3.23465
fruits	VaKNOX3	25.1479	25.1322	25.2137	26.8369	26.7601	26.7417	25.1646	26.7796	-1.61499	0.111658	-1.72664	3.30957
fruits	VaKNOX3	25.2705	25.1359	25.1375	26.7586	26.7639	26.8065	25.1813	26.7763	-1.59504	0.111658	-1.7067	3.26412
flowers	VaKNOX3	25.1604	25.1351	25.2567	25.9477	25.963	25.9847	25.1841	25.9651	-0.781052	0.111658	-0.89271	1.85666
flowers	VaKNOX3	25.2518	25.1957	25.2139	25.9381	25.9935	25.9208	25.2204	25.9508	-0.730338	0.0915075	-0.821845	1.76767
flowers	VaKNOX3	25.2622	25.1935	25.2161	25.9476	25.9039	25.964	25.2239	25.9385	-0.714607	0.111658	-0.826265	1.77309
stems	VaKNOX3	26.2576	26.259	26.318	26.2476	26.057	26.1159	26.2782	26.1402	0.138024	0.111658	0.026366	0.98189
stems	VaKNOX3	26.5711	26.302	26.5429	26.5602	26.3899	26.3308	26.472	26.427	0.0449914	0.111658	-0.0666662	1.04729
stems	VaKNOX3	26.9677	26.9919	27.0508	26.9558	26.7698	26.8287	27.0034	26.8515	0.151958	0.111658	0.0403002	0.972453
buds	VaKNOX4	26.0954	26.1202	26.2051	27.8772	27.8482	27.8331	26.1403	27.8528	-1.71258	0.140127	-1.85271	3.61178
buds	VaKNOX4	26.1414	26.136	26.184	27.8223	27.8881	27.812	26.1538	27.8408	-1.68699	0.140127	-1.82711	3.54827
buds	VaKNOX4	26.1612	26.214	26.0989	27.8434	27.882	27.8669	26.1581	27.8641	-1.70604	0.140127	-1.84617	3.59544
old leaves	VaKNOX4	26.3324	26.2349	26.2938	27.2115	27.1629	27.2218	26.2871	27.1987	-0.911681	0.140127	-1.05181	2.07313
old leaves	VaKNOX4	26.8554	26.9148	26.8557	27.8336	27.8428	27.7837	26.8753	27.82	-0.944714	0.140127	-1.08484	2.12114
old leaves	VaKNOX4	26.5414	26.5997	26.5406	27.5187	27.5277	27.4686	26.5606	27.505	-0.944414	0.140127	-1.08454	2.1207
tendrils	VaKNOX4	26.4664	26.4236	26.4645	27.6428	27.6516	27.5925	26.4515	27.629	-1.17745	0.140127	-1.31757	2.49247
tendrils	VaKNOX4	26.3274	26.2715	26.3004	27.4029	27.4995	27.4284	26.2998	27.4436	-1.14381	0.140127	-1.28394	2.43503
tendrils	VaKNOX4	26.5684	26.5877	26.5848	27.843	27.8054	27.7763	26.5803	27.8082	-1.22791	0.140127	-1.36804	2.58119
seeds	VaKNOX4	26.1544	26.1623	26.0932	27.5281	27.4903	27.4612	26.1367	27.4932	-1.35654	0.140127	-1.49667	2.82191
seeds	VaKNOX4	26.1779	26.1862	26.1571	27.6522	27.6142	27.5851	26.1738	27.6172	-1.4434	0.140127	-1.58353	2.99703
seeds	VaKNOX4	26.1894	26.2401	26.131	27.6313	27.5681	27.659	26.1869	27.6195	-1.43261	0.140127	-1.57274	2.97469
roots	VaKNOX4	26.0314	25.912	25.2749	25.9024	25.84	25.2029	25.7395	25.6484	0.0910233	0.140127	-0.0491036	1.03462
roots	VaKNOX4	26.0044	25.9609	25.9898	25.8745	25.7889	25.8178	25.9851	25.8271	0.15799	0.140127	0.0178636	0.987694
roots	VaKNOX4	25.8284	25.8298	25.8575	25.8976	25.7578	25.7837	25.8386	25.8131	0.0255357	0.140127	-0.114591	1.08267
fruits	VaKNOX4	26.5404	26.5847	26.5336	26.8087	26.8127	26.8626	26.5529	26.828	-0.275076	0.140127	-0.415203	1.33349
fruits	VaKNOX4	26.2644	26.3126	26.3146	26.5318	26.5106	26.5225	26.2972	26.5217	-0.224441	0.140127	-0.364568	1.2875
fruits	VaKNOX4	26.3574	26.3236	26.3885	26.5239	26.6515	26.6164	26.3565	26.5973	-0.240807	0.140127	-0.380934	1.30218
flowers	VaKNOX4	26.4514	26.4475	26.4294	26.567	26.4754	26.4573	26.4427	26.4999	-0.0571737	0.140127	-0.197301	1.14655
flowers	VaKNOX4	26.4664	26.3974	26.4813	26.4711	26.4253	26.4092	26.4483	26.4352	0.0131268	0.140127	-0.127	1.09202
flowers	VaKNOX4	26.6034	26.6013	26.7252	26.8672	26.5292	26.6531	26.6433	26.6832	-0.039906	0.140127	-0.180033	1.13291
stems	VaKNOX4	26.2967	26.3425	26.3844	26.2813	26.0804	26.1223	26.3412	26.1614	0.179826	0.140127	0.0396995	0.972858
stems	VaKNOX4	26.5142	26.6374	26.5953	26.4979	26.3653	26.3232	26.5823	26.3955	0.186794	0.140127	0.0466667	0.968171
stems	VaKNOX4	27.0067	26.8653	26.9072	26.9895	26.7932	26.8351	26.9264	26.8726	0.0537607	0.140127	-0.0863662	1.06169
buds	VaKNOX5	25.5664	25.5599	25.6838	27.6266	27.5878	27.6117	25.6034	27.6087	-2.00537	-0.0607148	-1.94466	3.84946
buds	VaKNOX5	25.6274	25.6108	25.5957	27.5867	27.6387	27.5236	25.6113	27.583	-1.97174	-0.0607148	-1.91102	3.76075
buds	VaKNOX5	25.6884	25.6717	25.6286	27.6468	27.5996	27.5565	25.6629	27.601	-1.9381	-0.0607148	-1.87739	3.67409
old leaves	VaKNOX5	25.3034	25.2532	25.2745	25.8609	25.8595	25.8024	25.277	25.841	-0.563939	-0.0607148	-0.503224	1.41738
old leaves	VaKNOX5	25.3189	25.4226	25.2874	26.006	25.9584	25.9153	25.343	25.9599	-0.616949	-0.0607148	-0.556234	1.47043
old leaves	VaKNOX5	25.3224	25.2802	25.2659	25.8781	25.8303	25.8872	25.2895	25.8652	-0.575693	-0.0607148	-0.514978	1.42897
tendrils	VaKNOX5	25.7725	25.7513	25.8082	27.3272	27.2792	27.2361	25.7773	27.2809	-1.50357	-0.0607148	-1.44285	2.71858
tendrils	VaKNOX5	26.1275	25.9002	25.3491	27.3813	27.3281	27.277	25.7922	27.3288	-1.5366	-0.0607148	-1.47589	2.78154
tendrils	VaKNOX5	25.7545	25.2481	26.013	27.2074	27.176	27.3409	25.6718	27.2415	-1.56963	-0.0607148	-1.50892	2.84597
seeds	VaKNOX5	27.3213	27.2627	27.2105	27.3734	27.2907	27.0385	27.2648	27.2342	0.0306672	-0.0607148	0.0913821	0.938623
seeds	VaKNOX5	27.5166	27.481	27.4237	27.3178	27.409	27.5517	27.4738	27.4261	0.0476344	-0.0607148	0.108349	0.927649
seeds	VaKNOX5	27.5889	27.6487	27.5643	27.6792	27.6767	27.6923	27.6006	27.6827	-0.0820651	-0.0607148	-0.0213502	1.01491
roots	VaKNOX5	27.7545	27.7964	27.8353	28.1038	28.0144	27.9633	27.7954	28.0272	-0.231765	-0.0607148	-0.17105	1.12588
roots	VaKNOX5	27.8039	27.8428	27.7364	27.9523	28.0708	27.9643	27.7943	27.9958	-0.201464	-0.0607148	-0.140749	1.10248
roots	VaKNOX5	27.8211	27.8932	27.8396	28.1487	28.0712	27.9676	27.8513	28.0625	-0.211164	-0.0607148	-0.150449	1.10991
fruits	VaKNOX5	25.5265	25.5544	25.5393	27.6431	27.7824	27.4673	25.54	27.6309	-2.09086	-0.0607148	-2.03015	4.08447
fruits	VaKNOX5	25.6388	25.6542	25.5661	27.5846	27.7822	27.694	25.6197	27.6869	-2.06723	-0.0607148	-2.00651	4.0181
fruits	VaKNOX5	25.5199	25.6213	25.6547	27.7434	27.6493	27.6826	25.5986	27.6918	-2.09315	-0.0607148	-2.03244	4.09095
flowers	VaKNOX5	26.1765	26.1941	26.1275	26.3204	26.3421	26.406	26.166	26.3561	-0.190125	-0.0607148	-0.12941	1.09385
flowers	VaKNOX5	26.1371	26.1585	26.2435	26.4145	26.513	26.2629	26.1797	26.3968	-0.217066	-0.0607148	-0.156351	1.11446
flowers	VaKNOX5	26.1375	26.244	26.189	26.4696	26.4679	26.2178	26.1901	26.3851	-0.194932	-0.0607148	-0.134217	1.0975
stems	VaKNOX5	27.3588	27.9159	27.6008	27.338	27.8438	27.5287	27.6251	27.5702	0.0549628	-0.0607148	0.115678	0.922949
stems	VaKNOX5	27.3293	27.8438	27.5259	27.3776	27.8017	27.4866	27.5663	27.5553	0.0109956	-0.0607148	0.0717105	0.951509
stems	VaKNOX5	27.9808	27.1757	27.1686	27.9582	27.4936	27.6175	27.4417	27.6898	-0.248103	-0.0607148	-0.187388	1.1387
buds	VaKNOX6	25.1975	25.1195	25.0384	26.636	26.5472	26.5664	25.1185	26.5832	-1.46475	-0.0160187	-1.44873	2.72968
buds	VaKNOX6	25.0485	25.1014	25.1033	26.5861	26.5294	26.5783	25.0844	26.5646	-1.48018	-0.0160187	-1.46416	2.75904
buds	VaKNOX6	25.1655	25.0123	25.0842	26.6022	26.5403	26.5312	25.0873	26.5579	-1.47057	-0.0160187	-1.45455	2.74072
old leaves	VaKNOX6	25.3825	25.9962	25.8681	25.9183	25.9242	25.7961	25.7489	25.8795	-0.13059	-0.0160187	-0.114572	1.08265
old leaves	VaKNOX6	25.7515	25.2691	25.988	25.8864	25.8971	25.916	25.6695	25.8998	-0.23029	-0.0160187	-0.214271	1.16012
old leaves	VaKNOX6	26.1695	25.918	25.3669	26.0035	25.846	25.8949	25.8181	25.9148	-0.096656	-0.0160187	-0.0806373	1.05749
tendrils	VaKNOX6	26.6395	26.5899	26.7078	27.4726	27.5179	27.6358	26.6457	27.5421	-0.896355	-0.0160187	-0.880337	1.8408
tendrils	VaKNOX6	26.7675	26.8978	26.5827	27.6997	27.8258	27.5107	26.7493	27.6787	-0.929388	-0.0160187	-0.91337	1.88344
tendrils	VaKNOX6	26.8935	26.8517	26.7736	27.8248	27.6797	27.6036	26.8396	27.7027	-0.863104	-0.0160187	-0.847085	1.79886
seeds	VaKNOX6	25.7825	25.8396	25.7635	27.8129	27.4676	27.5915	25.7952	27.624	-1.82879	-0.0160187	-1.81277	3.51316
seeds	VaKNOX6	25.7824	25.7435	25.8284	27.654	27.7715	27.4564	25.7848	27.6273	-1.8425	-0.0160187	-1.82648	3.54671
seeds	VaKNOX6	25.7265	25.7814	25.7053	27.7551	27.5094	27.6333	25.7377	27.6326	-1.89485	-0.0160187	-1.87883	3.67778
roots	VaKNOX6	29.0935	28.7123	28.1912	28.4212	28.6403	28.5192	28.6657	28.5269	0.138781	-0.0160187	0.1548	0.898257
roots	VaKNOX6	28.8585	28.1772	28.6211	28.6853	28.5052	28.5491	28.5523	28.5799	-0.0275853	-0.0160187	-0.0115666	1.00805
roots	VaKNOX6	28.4315	28.2131	28.657	28.6574	28.5411	28.585	28.4339	28.5945	-0.160618	-0.0160187	-0.144599	1.10542
fruits	VaKNOX6	28.7665	28.682	28.4209	28.8915	28.61	28.7489	28.6231	28.7501	-0.126984	-0.0160187	-0.110966	1.07995
fruits	VaKNOX6	28.8625	28.1759	28.6198	28.6866	28.5039	28.5478	28.5527	28.5794	-0.0266838	-0.0160187	-0.0106651	1.00742
fruits	VaKNOX6	29.0915	28.7048	28.1977	28.9147	28.6328	28.7257	28.6647	28.7577	-0.0930499	-0.0160187	-0.0770312	1.05485
flowers	VaKNOX6	26.8975	26.5857	26.7356	26.8198	26.5137	26.8636	26.7396	26.7324	0.00725057	-0.0160187	0.0232693	0.984
flowers	VaKNOX6	26.2715	26.4216	26.8455	26.5929	26.3496	26.7735	26.5129	26.572	-0.0591156	-0.0160187	-0.0430969	1.03032
flowers	VaKNOX6	26.7495	26.6595	26.8244	26.57	26.8875	26.7524	26.7445	26.7366	0.00785158	-0.0160187	0.0238703	0.983591
stems	VaKNOX6	26.0559	26.2901	26.0856	27.0297	26.9181	26.0136	26.1439	26.6538	-0.509901	-0.0160187	-0.493882	1.40823
stems	VaKNOX6	26.413	26.0502	26.9059	26.1033	25.9781	25.8339	26.4564	25.9718	0.484604	-0.0160187	0.500623	0.706802
stems	VaKNOX6	26.5359	26.0327	26.4076	26.5079	26.2011	26.3356	26.3254	26.3482	-0.0227595	-0.0160187	-0.00674081	1.00468
buds	VaKNOX7	25.1625	25.1451	25.211	26.8294	26.7131	26.809	25.1729	26.7838	-1.61095	0.160668	-1.77161	3.41436
buds	VaKNOX7	25.0165	25.297	25.1469	26.8325	26.725	26.8749	25.1535	26.8108	-1.65731	0.160668	-1.81798	3.52587
buds	VaKNOX7	25.1245	25.2179	25.1328	26.8396	26.8559	26.7208	25.1584	26.8054	-1.64701	0.160668	-1.80768	3.50079
old leaves	VaKNOX7	26.7695	26.4308	26.8347	26.6837	26.3588	26.7627	26.6784	26.6017	0.0766218	0.160668	-0.084046	1.05999
old leaves	VaKNOX7	26.7625	26.5397	26.8896	26.7758	26.4677	26.8176	26.7306	26.687	0.0435889	0.160668	-0.117079	1.08454
old leaves	VaKNOX7	26.7545	26.5306	26.8805	26.7669	26.6586	26.8085	26.7219	26.7447	-0.0227772	0.160668	-0.183445	1.13559
tendrils	VaKNOX7	27.6195	27.6185	27.7814	28.631	28.6465	28.1094	27.6732	28.4623	-0.789143	0.160668	-0.949811	1.93162
tendrils	VaKNOX7	27.6645	27.5924	27.7363	28.6751	28.5204	28.5643	27.6644	28.5866	-0.922176	0.160668	-1.08284	2.11821
tendrils	VaKNOX7	27.5465	27.6906	27.7502	28.6562	28.6343	28.5782	27.6625	28.6229	-0.960446	0.160668	-1.12111	2.17515
seeds	VaKNOX7	28.8355	28.2182	28.6621	28.6443	28.7462	28.5901	28.572	28.6602	-0.0882419	0.160668	-0.24891	1.18831
seeds	VaKNOX7	29.0905	28.6851	28.214	28.8984	28.6131	28.742	28.6632	28.7512	-0.0879414	0.160668	-0.248609	1.18806
seeds	VaKNOX7	28.4735	28.382	28.6259	28.6805	28.71	28.5539	28.4938	28.6481	-0.154308	0.160668	-0.314975	1.24399
roots	VaKNOX7	27.4035	27.8879	27.5729	27.7096	27.8159	27.5008	27.6214	27.6755	-0.054007	0.160668	-0.214675	1.16044
roots	VaKNOX7	27.6425	27.5689	27.6928	27.8477	27.7968	27.6207	27.6347	27.7551	-0.120373	0.160668	-0.281041	1.21507
roots	VaKNOX7	27.6735	27.6728	27.5467	27.8778	27.7007	27.7246	27.631	27.7677	-0.136739	0.160668	-0.297407	1.22893
fruits	VaKNOX7	28.0085	27.5327	27.6566	27.6119	27.4606	27.5845	27.7326	27.5524	0.180228	0.160668	0.0195601	0.986533
fruits	VaKNOX7	27.4555	27.8396	27.5245	27.758	27.6675	27.6524	27.6065	27.6927	-0.0861383	0.160668	-0.246806	1.18658
fruits	VaKNOX7	27.8655	27.5875	27.7114	27.8671	27.7154	27.6393	27.7215	27.7406	-0.0191712	0.160668	-0.179839	1.13276
flowers	VaKNOX7	25.4605	25.2134	25.3143	25.8612	25.8413	25.9422	25.3294	25.8816	-0.552204	0.160668	-0.712872	1.63906
flowers	VaKNOX7	25.2825	25.4893	25.3382	25.9823	25.8172	25.7661	25.37	25.8552	-0.485237	0.160668	-0.645905	1.56472
flowers	VaKNOX7	25.1525	25.2582	25.3071	25.9514	25.7861	25.835	25.2393	25.8575	-0.61827	0.160668	-0.778937	1.71587
stems	VaKNOX7	25.7661	25.2381	26.047	25.729	25.166	25.975	25.6837	25.6233	0.06039	0.160668	-0.100278	1.07198
stems	VaKNOX7	25.8436	26.4179	25.8899	25.3057	25.946	25.8179	26.0505	25.6898	0.360641	0.160668	0.199973	0.870567
stems	VaKNOX7	25.3591	26.0009	25.8728	25.3203	25.9289	25.8008	25.7443	25.6833	0.0609728	0.160668	-0.0996949	1.07155
buds	VaKNOX8	25.4875	25.5108	25.4737	26.7828	26.7387	26.8016	25.4907	26.7744	-1.28373	0.103314	-1.38705	2.61543
buds	VaKNOX8	25.5445	25.5667	25.6166	26.7389	26.7946	26.8445	25.5759	26.7927	-1.21676	0.103314	-1.32008	2.49679
buds	VaKNOX8	25.5995	25.5526	25.6025	26.793	26.8806	26.8304	25.5849	26.8347	-1.24981	0.103314	-1.35312	2.55464
old leaves	VaKNOX8	25.2916	25.1305	25.1862	25.5841	25.5584	25.4142	25.2028	25.5189	-0.316166	0.103314	-0.41948	1.33745
old leaves	VaKNOX8	25.0511	25.1294	25.3616	25.3428	25.4221	25.2895	25.1807	25.3515	-0.170762	0.103314	-0.274076	1.20922
old leaves	VaKNOX8	25.2051	25.1485	25.1636	25.3959	25.2765	25.1915	25.1724	25.288	-0.115565	0.103314	-0.218879	1.16383
tendrils	VaKNOX8	26.5868	26.4759	26.2342	27.2578	27.3867	27.2621	26.4323	27.3022	-0.869937	0.103314	-0.973251	1.96326
tendrils	VaKNOX8	26.3524	26.124	26.2369	27.1414	27.052	27.1649	26.2378	27.1194	-0.881631	0.103314	-0.984945	1.97924
tendrils	VaKNOX8	26.2174	26.3289	26.2881	27.1054	27.1568	26.9161	26.2781	27.0595	-0.78133	0.103314	-0.884644	1.84631
seeds	VaKNOX8	25.9486	25.9983	25.9739	26.2357	26.2463	26.3519	25.9736	26.278	-0.304363	0.103314	-0.407677	1.32655
seeds	VaKNOX8	26.9624	26.8752	26.9861	27.1487	27.2032	27.2141	26.9413	27.1886	-0.247396	0.103314	-0.35071	1.27519
seeds	VaKNOX8	26.1155	26.182	26.1312	26.3008	26.41	26.3592	26.1429	26.3567	-0.213762	0.103314	-0.317076	1.2458
roots	VaKNOX8	26.5447	26.5357	26.5096	26.6291	26.5636	26.7376	26.53	26.6435	-0.113462	0.103314	-0.216775	1.16213
roots	VaKNOX8	27.2283	27.2684	27.1627	27.2119	27.2964	27.3907	27.2198	27.2996	-0.0798277	0.103314	-0.183142	1.13535
roots	VaKNOX8	27.1146	27.054	27.1155	27.2973	26.9819	27.0435	27.0947	27.1076	-0.0128606	0.103314	-0.116174	1.08386
fruits	VaKNOX8	28.6033	28.2036	28.4272	28.385	28.1316	28.3552	28.4114	28.2906	0.120773	0.103314	0.0174595	0.987971
fruits	VaKNOX8	28.4806	28.2012	28.6451	28.4614	28.1292	28.5731	28.4423	28.3879	0.0544071	0.103314	-0.0489067	1.03448
fruits	VaKNOX8	28.307	28.341	28.3566	28.187	28.269	28.2846	28.3349	28.2468	0.088041	0.103314	-0.0152728	1.01064
flowers	VaKNOX8	28.0326	28.1787	28.2276	28.8116	28.7067	28.1556	28.1463	28.558	-0.411659	0.103314	-0.514972	1.42897
flowers	VaKNOX8	28.382	28.2351	28.4287	28.9601	29.0631	28.6567	28.3486	28.8933	-0.544691	0.103314	-0.648005	1.567
flowers	VaKNOX8	27.8866	27.8608	27.9967	28.9638	28.5888	28.1247	27.9147	28.5591	-0.644391	0.103314	-0.747705	1.67912
stems	VaKNOX8	25.1968	25.2981	25.2697	25.1651	25.2261	25.1977	25.2549	25.1963	0.0585689	0.103314	-0.0447449	1.0315
stems	VaKNOX8	26.2853	26.1752	26.2692	26.2527	26.1032	26.1971	26.2432	26.1844	0.0588693	0.103314	-0.0444445	1.03129
stems	VaKNOX8	25.8087	25.2075	25.3069	25.3752	25.1355	25.2349	25.441	25.2485	0.192503	0.103314	0.0891894	0.940051
buds	VaKNOX9	25.0206	24.9614	25.0823	25.9942	25.8894	25.9103	25.0214	25.9313	-0.909856	0.089142	-0.998998	1.99861
buds	VaKNOX9	24.9216	25.0953	25.0142	25.9843	25.8233	25.8722	25.0104	25.8933	-0.882888	0.089142	-0.97203	1.9616
buds	VaKNOX9	25.0426	25.0241	24.9821	25.9144	25.9692	25.9301	25.0163	25.9379	-0.921616	0.089142	-1.01076	2.01497
old leaves	VaKNOX9	27.7286	27.6981	27.583	27.5995	27.6261	27.511	27.6699	27.5789	0.091046	0.089142	0.00190397	0.998681
old leaves	VaKNOX9	27.5406	27.524	27.6479	27.6106	27.452	27.5759	27.5708	27.5462	0.0246798	0.089142	-0.0644622	1.0457
old leaves	VaKNOX9	27.7436	27.8849	27.5698	27.6327	27.7129	27.4978	27.7328	27.6145	0.118314	0.089142	0.0291716	0.979983
tendrils	VaKNOX9	25.9616	25.9078	25.9727	26.5298	26.8358	26.7007	25.9474	26.6888	-0.741386	0.089142	-0.830528	1.77834
tendrils	VaKNOX9	26.0206	26.1397	26.0656	26.6879	26.7677	26.7936	26.0753	26.7497	-0.674419	0.089142	-0.763561	1.69768
tendrils	VaKNOX9	26.1014	26.1336	26.1835	26.78	26.7616	26.8115	26.1395	26.7844	-0.644862	0.089142	-0.734004	1.66325
seeds	VaKNOX9	26.8486	26.8005	26.8544	26.9141	26.9285	26.9824	26.8345	26.9417	-0.107151	0.089142	-0.196293	1.14575
seeds	VaKNOX9	26.9307	27.0639	27.0533	26.9953	27.0918	27.0813	27.0159	27.0561	-0.0401838	0.089142	-0.129326	1.09378
seeds	VaKNOX9	27.083	27.1113	27.1101	27.0467	27.0393	27.0381	27.1015	27.0414	0.0601167	0.089142	-0.0290253	1.02032
roots	VaKNOX9	27.345	27.3903	27.4543	27.3078	27.2318	27.3822	27.3965	27.3073	0.0892357	0.089142	9.37083e-05	0.999935
roots	VaKNOX9	27.3607	27.2546	27.2255	27.3226	27.1825	27.2153	27.2803	27.2402	0.0400963	0.089142	-0.0490458	1.03458
roots	VaKNOX9	27.7801	27.4256	27.3912	27.4411	27.3536	27.3191	27.5323	27.3713	0.161018	0.089142	0.0718762	0.9514
fruits	VaKNOX9	25.4416	25.4899	25.3888	25.6017	25.5179	25.5177	25.4401	25.5458	-0.105643	0.089142	-0.194785	1.14455
fruits	VaKNOX9	25.5884	25.4792	25.3124	25.5476	25.6071	25.6104	25.46	25.5884	-0.128381	0.089142	-0.217523	1.16274
fruits	VaKNOX9	25.6086	25.5647	25.6136	25.7669	25.7927	25.6416	25.5957	25.7337	-0.13808	0.089142	-0.227222	1.17058
flowers	VaKNOX9	26.6527	26.7289	26.7891	27.2843	27.217	27.4171	26.7236	27.3061	-0.582564	0.089142	-0.671706	1.59296
flowers	VaKNOX9	26.639	26.6206	26.6431	27.1467	27.2485	27.3711	26.6342	27.2554	-0.621205	0.089142	-0.710347	1.6362
flowers	VaKNOX9	26.8769	26.8107	26.814	27.2325	27.3015	27.3676	26.8339	27.3005	-0.466675	0.089142	-0.555817	1.47
stems	VaKNOX9	27.3102	27.9265	27.6114	27.2677	27.8545	27.5394	27.616	27.5539	0.0621749	0.089142	-0.0269672	1.01887
stems	VaKNOX9	27.9747	27.4914	27.7153	27.9313	27.5194	27.6433	27.7271	27.698	0.029142	0.089142	-0.06	1.04247
stems	VaKNOX9	27.7562	27.8173	27.5622	27.312	27.8053	27.4902	27.7119	27.5358	0.176109	0.089142	0.0869672	0.9415
buds	VaKNOX10	26.7886	26.815	26.8719	28.6406	28.643	28.6929	26.8252	28.6588	-1.83364	-0.0134688	-1.82017	3.53124
buds	VaKNOX10	26.9256	26.7369	26.7178	28.6767	28.4649	28.6458	26.7935	28.5958	-1.80234	-0.0134688	-1.78887	3.45545
buds	VaKNOX10	26.8606	26.7848	26.7917	28.7151	28.6128	28.7297	26.8124	28.6859	-1.87347	-0.0134688	-1.86	3.63007
old leaves	VaKNOX10	25.5116	25.5947	25.6044	25.6609	25.7227	25.9716	25.5702	25.7851	-0.214835	-0.0134688	-0.201366	1.14979
old leaves	VaKNOX10	25.6226	25.8666	25.3155	25.971	25.7946	25.8435	25.6016	25.8697	-0.268108	-0.0134688	-0.254639	1.19304
old leaves	VaKNOX10	25.4676	25.6195	25.5714	25.8151	25.9275	25.7994	25.5529	25.8473	-0.294474	-0.0134688	-0.281005	1.21504
tendrils	VaKNOX10	25.1126	25.3084	25.2583	26.8592	26.5364	26.8863	25.2265	26.7606	-1.53417	-0.0134688	-1.5207	2.86931
tendrils	VaKNOX10	25.2776	25.3113	25.1859	26.7233	26.6193	26.7872	25.2583	26.7099	-1.45165	-0.0134688	-1.43818	2.70979
tendrils	VaKNOX10	25.1326	25.1285	25.0762	26.5274	26.6782	26.5041	25.1124	26.5699	-1.45749	-0.0134688	-1.44402	2.72078
seeds	VaKNOX10	26.2006	26.1932	26.1431	26.6445	26.5211	26.871	26.1789	26.6789	-0.499939	-0.0134688	-0.48647	1.40101
seeds	VaKNOX10	26.2076	26.1231	26.188	26.5506	26.651	26.7159	26.1729	26.6392	-0.466305	-0.0134688	-0.452836	1.36873
seeds	VaKNOX10	26.0506	26.04	26.1049	26.5877	26.4079	26.5428	26.0651	26.5128	-0.447671	-0.0134688	-0.434202	1.35116
roots	VaKNOX10	26.5277	26.5175	26.4782	26.6688	26.7455	26.6062	26.5078	26.6735	-0.165704	-0.0134688	-0.152235	1.11129
roots	VaKNOX10	26.4676	26.5858	26.6057	26.8079	26.7837	26.8336	26.553	26.8084	-0.255404	-0.0134688	-0.241935	1.18258
roots	VaKNOX10	26.3436	26.4317	26.5176	26.683	26.7596	26.7455	26.431	26.7294	-0.298436	-0.0134688	-0.284968	1.21838
fruits	VaKNOX10	26.8456	26.9556	26.8205	26.5841	26.8835	26.7484	26.8739	26.7387	0.135198	-0.0134688	0.148666	0.902084
fruits	VaKNOX10	26.3966	26.3805	26.8684	26.4342	26.7084	26.7963	26.5485	26.6463	-0.0978353	-0.0134688	-0.0843665	1.06022
fruits	VaKNOX10	26.6336	26.8574	26.5833	26.3703	26.7853	26.7112	26.6914	26.6223	0.0691318	-0.0134688	0.0826006	0.944354
flowers	VaKNOX10	25.8796	25.9923	25.9052	26.6154	26.7202	26.7801	25.9257	26.7053	-0.779551	-0.0134688	-0.766082	1.70065
flowers	VaKNOX10	25.8116	25.8322	25.9011	26.5465	26.7101	26.729	25.8483	26.6619	-0.8136	-0.0134688	-0.800132	1.74126
flowers	VaKNOX10	25.7856	25.8901	25.955	26.5196	26.818	26.6829	25.8769	26.6735	-0.796633	-0.0134688	-0.783165	1.7209
stems	VaKNOX10	27.7474	27.3995	27.0076	27.6995	27.3275	26.9356	27.3848	27.3209	0.0639779	-0.0134688	0.0774467	0.947733
stems	VaKNOX10	26.6332	27.307	27.1328	26.7844	27.2347	27.5607	27.0243	27.1933	-0.168963	-0.0134688	-0.155494	1.1138
stems	VaKNOX10	27.2236	27.2804	27.1855	27.1739	27.2083	27.1135	27.2298	27.1652	0.0645789	-0.0134688	0.0780477	0.947339

## Sheet: Raw data
Gene Name：VaKNOX1				Gene Name：VaKNOX2				Gene Name：VaKNOX3				Gene Name：VaKNOX4				Gene Name：VaKNOX5
	Sample Name				Sample Name				Sample Name				Sample Name				Sample Name
	normal	cold			normal	cold			normal	cold			normal	cold			normal	cold
1	0.982466	0.486522		1	1.00484	0.393036		1	0.98189	0.967768		1	0.972858	0.297865		1	0.922949	0.241499
2	1.02667	0.485807		2	1	0.6209		2	1.04729	0.838432		2	0.968171	0.263904		2	0.951509	0.211655
3	0.991404	0.511251		3	0.995182	0.389658		3	0.972453	0.958465		3	1.06169	0.284296		3	1.1387	0.283775
mean	1.00018	0.494527		mean	1.00001	0.467864		mean	1.00055	0.921555		mean	1.00091	0.282022		mean	1.00439	0.245643
SE	0.0233734	0.0144879		SE	0.00482928	0.132543		SE	0.0407592	0.0721368		SE	0.0526941	0.0170946		SE	0.117193	0.0362382
Gene Name：VaKNOX6				Gene Name：VaKNOX7				Gene Name：VaKNOX8				Gene Name：VaKNOX9				Gene Name：VaKNOX10
	Sample Name				Sample Name				Sample Name				Sample Name				Sample Name
	normal	cold			normal	cold			normal	cold			normal	cold			normal	cold
1	1.40823	3.62916		1	1.07198	2.65687		1	1.0315	0.897413		1	1.01887	0.475022		1	0.947733	1.13943
2	0.706802	3.54556		2	0.870567	2.699		2	1.03129	1.0071		2	1.04247	0.584699		2	1.1138	0.946944
3	1.00468	4.16711		3	1.07155	2.29548		3	0.940051	1.1302		3	0.9415	0.54543		3	0.947339	0.903993
mean	1.0399	3.78061		mean	1.0047	2.55045		mean	1.00095	1.01157		mean	1.00094	0.53505		mean	1.00296	0.996791
SE	0.352038	0.337317		SE	0.116161	0.221817		SE	0.0527368	0.116457		SE	0.0528154	0.0555703		SE	0.0959945	0.125386
Gene Name：VaKNOX1										Gene Name：VaKNOX2
	Sample Name										Sample Name
	buds	old leaves	tendrils	seeds	roots	fruits	flowers	stems			buds	old leaves	tendrils	seeds	roots	fruits	flowers	stems
1	1.80948	1.19307	3.29537	0.842572	0.80402	0.830286	1.34364	0.982466		1	3.1679	2.04102	2.51123	1.14406	0.972602	3.79918	1.37375	1.00484
2	2.07812	1.16557	3.78263	0.700232	0.822642	0.901731	1.4739	1.02667		2	3.0949	1.90395	2.39732	1.19791	0.928488	3.62686	1.28149	1
3	1.81793	1.13157	3.37099	0.733196	0.841695	0.901543	1.30396	0.991404		3	3.39393	1.94804	2.56885	1.24852	1.02053	3.54328	1.31117	0.995182
mean	1.90184	1.1634	3.483	0.758667	0.822786	0.877853	1.37383	1.00018		mean	3.21891	1.96434	2.49247	1.19683	0.973874	3.65644	1.32213	1.00001
SE	0.152715	0.0308082	0.262231	0.07451	0.0188378	0.0411946	0.0889006	0.0233734		SE	0.155905	0.0699766	0.0872896	0.0522423	0.0460351	0.130488	0.0470991	0.00482928
Gene Name：VaKNOX3										Gene Name：VaKNOX4
	Sample Name										Sample Name
	buds	old leaves	tendrils	seeds	roots	fruits	flowers	stems			buds	old leaves	tendrils	seeds	roots	fruits	flowers	stems
1	3.02748	1.22877	2.98897	1.11374	1.01949	3.23465	1.85666	0.98189		1	3.61178	2.07313	2.49247	2.82191	1.03462	1.33349	1.14655	0.972858
2	3.0129	1.20046	3.11525	1.10327	1.09924	3.30957	1.79253	1.04729		2	3.54827	2.12114	2.43503	2.99703	0.987694	1.2875	1.09202	0.968171
3	3.1113	1.14487	2.96024	1.13585	1.09221	3.26412	1.77309	0.972453		3	3.59544	2.1207	2.58119	2.97469	1.08267	1.30218	1.13291	1.06169
mean	3.05056	1.17014	1.02104	0.669497	1.005	3.09667	2.28417	2.5567		mean	3.58516	2.10499	2.5029	2.93121	1.03499	1.30772	1.12383	1.00091
SE	0.0531057	0.0426837	0.0824623	0.0166332	0.0441545	0.0377414	0.0437324	0.0407592		SE	0.0329803	0.0275949	0.0736385	0.0953111	0.0474881	0.0234898	0.0283771	0.0526941
Gene Name：VaKNOX5										Gene Name：VaKNOX6
	Sample Name										Sample Name
	buds	old leaves	tendrils	seeds	roots	fruits	flowers	stems			buds	old leaves	tendrils	seeds	roots	fruits	flowers	stems
1	3.84946	1.41738	2.71858	0.938623	1.12588	4.08447	1.09385	0.922949		1	2.72968	1.08265	1.8408	3.51316	0.898257	1.07995	0.984	1.40823
2	3.76075	1.47043	2.78154	0.927649	1.10248	4.0181	1.11446	0.951509		2	2.75904	1.16012	1.88344	3.54671	1.00805	1.00742	1.03032	0.706802
3	3.67409	1.42897	2.84597	1.01491	1.10991	4.09095	1.0975	1.1387		3	2.74072	1.05749	1.79886	3.67778	1.10542	1.05485	0.983591	1.00468
mean	3.76144	1.43893	2.78203	0.960394	1.11276	4.06451	1.10194	1.00439		mean	2.74314	1.10009	1.84104	3.57922	1.00391	1.04741	0.999305	1.0399
SE	0.0876851	0.0278894	0.0636949	0.0475294	0.011956	0.0403192	0.0110027	0.117193		SE	0.0148278	0.0534908	0.0422886	0.08699	0.103645	0.0368334	0.0268636	0.352038
Gene Name：VaKNOX7										Gene Name：VaKNOX8
	Sample Name										Sample Name
	buds	old leaves	tendrils	seeds	roots	fruits	flowers	stems			buds	old leaves	tendrils	seeds	roots	fruits	flowers	stems
1	3.41436	1.05999	1.93162	1.18831	1.16044	0.986533	1.63906	1.07198		1	2.61543	1.33745	1.96326	1.32655	1.16213	0.987971	1.42897	1.0315
2	3.52587	1.08454	2.11821	1.18806	1.21507	1.18658	1.56472	0.870567		2	2.49679	1.20922	1.97924	1.27519	1.13535	1.03448	1.567	1.03129
3	3.50079	1.13559	2.17515	1.24399	1.22893	1.13276	1.71587	1.07155		3	2.55464	1.16383	1.84631	1.2458	1.08386	1.01064	1.67912	0.940051
mean	3.48034	1.09337	2.07499	1.20679	1.20148	1.10196	1.63988	1.0047		mean	2.55562	1.23683	1.9296	1.28251	1.12711	1.01103	1.55836	1.00095
SE	0.0585022	0.0385694	0.127386	0.0322195	0.0362113	0.103518	0.0755766	0.116161		SE	0.0593253	0.0900416	0.0725747	0.0408679	0.0397832	0.0232573	0.1253	0.0527368
Gene Name：VaKNOX9										Gene Name：VaKNOX10
	Sample Name										Sample Name
	buds	old leaves	tendrils	seeds	roots	fruits	flowers	stems			buds	old leaves	tendrils	seeds	roots	fruits	flowers	stems
1	1.99861	0.998681	1.77834	1.14575	0.999935	1.14455	1.59296	1.01887		1	3.53124	1.14979	2.86931	1.40101	1.11129	0.902084	1.70065	0.947733
2	1.9616	1.0457	1.69768	1.09378	1.03458	1.16274	1.6362	1.04247		2	3.45545	1.19304	2.70979	1.36873	1.18258	1.06022	1.74126	1.1138
3	2.01497	0.979983	1.66325	1.02032	0.9514	1.17058	1.47	0.9415		3	3.63007	1.21504	2.72078	1.35116	1.21838	0.944354	1.7209	0.947339
mean	1.99173	1.00812	1.71309	1.08662	0.995305	1.15929	1.56638	1.00094		mean	3.53892	1.18596	2.76663	1.37363	1.17075	0.968887	1.72094	1.00296
SE	0.0273432	0.0338576	0.0590709	0.0630201	0.0417831	0.0133507	0.0862252	0.0528154		SE	0.0875632	0.0331988	0.0890984	0.0252842	0.0545173	0.0818737	0.0203075	0.0959945
